1     **The spatial spread of HIV in Malawi: An individual-based mathematical**  
2                                     **model**

3

4

5     Janne ESTILL<sup>1,2</sup>, Wingston NG'AMBI<sup>3</sup>, Liudmila ROZANOVA<sup>1</sup>, Olivia KEISER<sup>1</sup>

6

7                     <sup>1</sup>Institute of Global Health, University of Geneva, Geneva, Switzerland

8     <sup>2</sup>Institute of Mathematical Statistics and Actuarial Science, University of Bern, Bern,  
9                                     Switzerland

10             <sup>3</sup>College of Medicine, Health Economics and Policy Unit, University of Malawi,  
11                                     Lilongwe, Malawi

12

13     Abstract 276 words, main text 3495 words, 1 table, 4 figures, and a Supporting  
14     Information file with 1 supplementary text, 4 supplementary tables and 1  
15     supplementary figure.

16

17                                     Correspondence to:

18                                     Janne Estill

19                             University of Geneva, Institute of Global Health  
20                             9 Chemin des Mines, 1202 Geneva, Switzerland

21                                     [janne.estill@unige.ch](mailto:janne.estill@unige.ch)

22                                     +41 (0)31 631 88 18

23

24

25     This work was supported by the Swiss National Science Foundation (grant 163878).

26

27

28

29

## 30 Abstract

31 The prevalence of HIV varies greatly between and within countries. We therefore developed a  
32 flexible individual-based mathematical model for HIV transmission, that comprises a spatial  
33 representation and individual-level determinants. We tested this model by calibrating it to the HIV  
34 epidemic in Malawi and exploring whether the heterogeneity in HIV prevalence could be caused  
35 without accounting for heterogeneity in behaviour. We ran the model for Malawi between years  
36 1975-2030 with five alternative realizations of the geographical structure and mobility: (I) no  
37 geographical structure; 28 administrative districts including (II) only permanent relocations between  
38 districts, (III) permanent relocations and between-district casual sexual relationships, or (IV)  
39 permanent relocations between districts and to/from abroad and between-district casual sex; and (V)  
40 a grid of 10x10km<sup>2</sup> cells, with permanent relocations and between-cell casual relationships. We  
41 assumed HIV was present in 1975 in the districts with >10% prevalence in 2010. We calibrated the  
42 models to national and district-level prevalence estimates.

43 Reaching the national prevalence required all adults to have at least 20 casual sex acts/year until  
44 1990. Models II, III and V reproduced the geographical heterogeneity in prevalence to some extent if  
45 between-district relationships were either excluded (Model II) or restricted to minimum (Models III,  
46 V). Long-distance casual partnership mixing (Models III-V) mitigated the differences in prevalence  
47 substantially; with international migration the differences disappeared completely (Model IV).

48 National prevalence was projected to decrease to 4-5% by 2030. Our model sustained the major  
49 differences in HIV prevalence across Malawi, if casual relationships between districts were kept at  
50 sufficiently low level. An earlier introduction of HIV into the Southern part of Malawi may thus be  
51 one of the explanations to the present heterogeneity in HIV prevalence.

52 **Keywords:** HIV; Malawi, Disease transmission, infectious; Computer simulation; Spatio-temporal  
53 analysis

## 54 **Author summary**

55 The prevalence of HIV varies greatly across the settings, both globally and within countries. The  
56 ability of the commonly used compartmental models to account for the geographical structure and  
57 individual-level determinants that cause this heterogeneity is limited. In this project, we developed  
58 an individual-based simulation framework for modelling HIV transmission in a real setting. We built  
59 the model to take into account an unlimited number of individual-level characteristics, and a  
60 geographical representation of the setting that can be defined using an arbitrary resolution and  
61 distance matrices. We demonstrate the use of this model by simulating the HIV epidemic of Malawi  
62 1975-2030 and exploring whether the observed heterogeneity could be preserved without taking  
63 into account any spatial heterogeneity in sexual behaviour. A relatively simple version of the model  
64 reproduced the broad-scale differences in HIV prevalence, but the detailed differences will need  
65 further investigation.

## 66 Introduction

67 HIV is one of the most serious global health emergencies that occurred during the past few decades.  
68 The severity of the HIV epidemic varies greatly across the world. Currently, adult HIV prevalence in  
69 the southernmost countries of Africa ranges between 9% and 27%, whereas outside of Africa there is  
70 no country with a prevalence above 2%.[1] Differences exist also within countries.[2] In 2019, Malawi  
71 had a national HIV prevalence of 8.9% with the district-level prevalence ranging between 4% and 22%  
72 and the epidemic being more severe in the southern part of the country. [3]  
73 The reasons behind the variability remain disputed. The risk of HIV depends on a complex network of  
74 biomedical, socioeconomic, cultural and behavioural factors and geographical structure.[4] People  
75 living in densely populated or well-connected areas may have a broader contact network, and thus  
76 the likelihood to have at least one partner who is infected is higher. International connectivity may  
77 also play a role. It is however unclear to what extent the varying burden of HIV is a result from the  
78 times and locations where HIV was first introduced into the country and the connections between  
79 the different geographical locations.  
80 Mathematical models are an essential tool in the evaluation of dynamics of infectious disease  
81 epidemics. We developed an individual-based mathematical model including a geographical  
82 structure to simulate the course of the Malawian HIV epidemic between 1975 and 2030. In the  
83 present study, we describe the technical details of the model, test if the observed variability in HIV  
84 prevalence can be reproduced by differences in the early stages of the epidemic, and make future  
85 projections for district-level HIV prevalence.

86

## 87 Methods

### 88 Model description

89 Our individual-based model consists of two interacting modules ([Fig. 1; Text S1, Table S1](#); the full  
90 model code is available on <https://gitlab.com/igh-idmm-public/agent-based-hiv-transmission-model>).  
91 The *transmission module* represents the population of the desired setting (Malawi). At the beginning  
92 of the simulation, an initial population is generated. For each individual we sample his/her age, sex,  
93 location of residence, a set of behavioural characteristics and biomedical factors, and the HIV status.  
94 Each child under age 15 is assigned a woman aged >15 years as mother, and men and women are  
95 paired to form regular partnerships. The population is updated in steps of one year, when the  
96 following events are sampled from pre-defined probabilities: an individual or family may move to  
97 another location; an individual's socio-behavioural or biomedical characteristics may change; a  
98 couple may separate and single individuals may form partnerships; uninfected individuals may  
99 acquire HIV; an individual may die; and infants may be born to women of childbearing age. The  
100 number of locations in the model can be chosen arbitrarily, and separate distance matrices are  
101 defined for permanent relocation and for selecting casual partners.

102 HIV transmission is determined by an algorithm consisting of two pathways: serodiscordant regular  
103 partnerships, or through casual relationships. In serodiscordant partnerships the uninfected partner  
104 may acquire HIV, and the risk depends on the infected partner's HIV status and the frequency of sex  
105 acts. Casual partnerships are not modelled explicitly, but an average risk of getting infected is  
106 calculated for each individual. The sociobehavioural characteristics determine each individual's  
107 number of casual sex acts, and the characteristics, age and geographical location the likelihood of  
108 each potential partner. The number of unprotected sex acts per year in casual and regular  
109 partnerships is adjusted with a year-specific coefficient to calibrate the model to observed  
110 prevalence estimates.

111 The *disease module* determines the progression of each infected individual's HIV infection ([Fig. 1;](#)  
112 [Text S1, Table S2](#)). The module is based on the R package *gems* and is similar to previously developed  
113 standalone HIV simulation models.[5-8] The course of infection is divided into health states based on

114 the natural course (primary infection, chronic infection, AIDS, HIV-related death), diagnosis status,  
115 and treatment status (off ART, 1<sup>st</sup>-line or 2<sup>nd</sup>-line; successful or failing treatment). The timings of  
116 transitions between health states are sampled from distributions. Each year, the model is called to  
117 simulate the course of infection for all individuals infected in that year. The outputs are then fed back  
118 to the transmission module to determine the infectiousness of each individual, and the time of HIV  
119 related death.

## 120 **Model calibration and scenarios**

121 We simulated the epidemic of Malawi for the years 1975-2030, with the aim to reproduce the  
122 differences in the epidemic across districts by the geographical structure alone. To save computing  
123 time, preliminary runs were done with a 10% sample of the total Malawian population, and the  
124 results were confirmed by running the model for the true population size, adjusting the parameters if  
125 necessary. We adapted the prior parameters from a previously published deterministic model, which  
126 we adjusted during the calibration of the model.[6] The population was divided into two risk groups  
127 that differed in terms of average frequency of unprotected sex acts. We iteratively increased the  
128 complexity of the mathematical model by adding geographical diversity, resulting in five alternative  
129 models ([Table 1](#); [Table S3](#)). At each step, we adjusted the number of annual sex acts in both risk  
130 groups by a year-specific coefficient (using the parameters of the previous model as a starting point)  
131 so that the national adult HIV prevalence would stay between the UNAIDS lower and upper estimates,  
132 or within 5% (relative) margin of these, from 1990 to 2019.

133 First, we ran the model without any geographical division (Model I). In the next step, we added a  
134 geographic dimension by dividing the population into 28 distinct locations, corresponding to the  
135 present administrative division of Malawi (Model II). Malawi consists of three regions (Northern,  
136 Central and Southern), which in turn are divided into a total of 28 administrative districts. We first  
137 assumed that 1% of the population would move to another, randomly selected, district every year,

138 and adjusted the rates of moving to and from certain districts to keep the prevalence close to the  
139 census data.[9] We allowed casual sex acts only within each district.

140 Next, we added the possibility to have casual sex acts between different districts (Model III). We used  
141 a distance measure that is based on the minimum number of district borders that need to be crossed  
142 between the districts (for example, the distance between neighbouring districts being 1). The  
143 likelihood to choose a partner is proportional to the negative exponent of the distance. We  
144 compared the district-level prevalence in 2010 with the estimates from DHS.[3,10] We made three  
145 attempts to either double or halve the distance scale, in order to either diminish or increase the  
146 differences in prevalence between districts, respectively, and get closer to the observed district-level  
147 prevalence.

148 In the following step, we added international migration, using a 29<sup>th</sup> geographical location  
149 representing the population connected to Malawi residing abroad (Model IV). Approximate in- and  
150 out-migration rates were taken from the literature, combining estimates on net migration and  
151 numbers of migrants living in Malawi.[11] We included at the beginning (1975) an additional  
152 population of 2,000,000 individuals who at that time were residing abroad. For people residing each  
153 year abroad, the risk of getting infected was determined from the HIV prevalence in the most  
154 common destinations of Malawians (South Africa, Zimbabwe, Mozambique). We scaled the risk of  
155 infection abroad and the level of casual acts within Malawi to find a balance between domestic and  
156 imported infections, leading to desired prevalence levels.

157 Finally, we ran a model with a finer geographical resolution (Model V). We divided Malawi into 946  
158 cells, corresponding to a 10x10 km<sup>2</sup> grid. For calculating the district-level prevalence, we determined  
159 the districts so that each cell would belong to one district. We set the population size in 1975 for the  
160 cells containing the 17 largest densely populated centres of Malawi to be equal to their actual size,  
161 and used the average based on each district's population for the remaining cells. We assumed the  
162 same rate of annual permanent moves as in Model II: because of the random allocation of the

163 destination cell, the vast majority of people and households who move would move to another  
164 district. For casual relationships, we used mixing based on Euclidean distance, scaled analogously to  
165 the distance in Model II (so that the maximum distance within the country would be equivalent).  
166 International migration was not considered in this model. We adjusted the sex acts and scale of  
167 mixing between cells to calibrate the model for the national and district-level prevalence data.

168

## 169 **Results**

170 In all models, the whole adult population needed at least monthly unprotected sex with a casual  
171 partner to reach the observed prevalence level ([Fig. 2](#)). The average number of annual casual sex acts  
172 producing the best fit in Model I was 20 for low-risk and 70 for high-risk individuals until early 1991.  
173 Between 1992 and 1995, the corresponding numbers were set at 16 and 54, between 1996 and 2002  
174 at 10 and 34, and from 2003 onwards, 12 and 40, respectively ([Fig. S1](#)). The corresponding numbers  
175 in models II to V were similar although small differences existed. HIV prevalence stayed within or  
176 close to the UNAIDS estimated range in all models after parameter adjustments. The decreasing  
177 trend was projected to continue from 2020 onwards, with the national prevalence reaching about 5%  
178 in 2030 in all models.

179 In the models with districts (Models II to IV), the moving rates out of Dedza, Dowa, Ntcheu and  
180 Zomba districts had to be increased from the default level 1% to 2% per year, and out of all other  
181 districts except Chitipa, Karonga, Mzimba, Lilongwe, Machinga, Mangochi and Neno to a lesser  
182 extent, to keep within the population distribution ([Supplemental Digital Content Table S4](#)). In turn,  
183 the attractivity of Neno district as a destination had to be increased by 50%. With these assumptions,  
184 the population sizes of all districts remained within a 10% margin of the census data.

185 When Likoma Island (no data) is excluded, the observed district-level prevalence among adults aged  
186 15-49 years in 2010 ranged between 4.4% (Chitipa) and 21.6% (Thyolo), the prevalence being



187 generally highest in the Southern region.[10] The heterogeneity between the three regions was  
188 preserved in the district-level model without international migration or inter-district causal  
189 relationships (Model II; [Fig. 3](#)). The prevalence distribution in 2010 was highest in the same districts  
190 where the infections were seeded in 1975, and the prevalence was generally higher in the Southern  
191 region than the rest of the country. The models however could not reproduce the finer-scale  
192 patterns, such as the concentration of highest prevalence into the densely populated districts of  
193 Chiradzulu, Mulanje and Thyolo, or the zone of notably low prevalence on the north side of the  
194 capital Lilongwe. The modelled prevalence in 2010 was highest in Balaka (16.2%) and Nsanje (16.0%)  
195 districts, and clearly lowest in Likoma (2.8%), followed by Dowa (7.3%). In 2030, the highest  
196 prevalence was projected in Nsanje (6.4%).

197 In Model III, the differences in HIV prevalence between districts almost disappeared in the first  
198 version where the distance between neighbouring districts was set to one unit. By doubling the  
199 distance three times (to 8 units per crossed district border), district-level prevalence in 2010 became  
200 clear. This metric can be interpreted as a person choosing a casual partner  $e^8 = 2980$  times more  
201 likely from his own district than from a neighbouring district. Similar to Model II, the prevalence in  
202 2010 was highest in the Southern region and in the few other districts where infections were seeded  
203 at the beginning of the model, but the observed heterogeneity between individual districts could not  
204 be reproduced ([Fig.3](#)). The lowest modelled prevalence in 2010 was in Mzimba (6.9%) and the  
205 highest in Balaka (16.9%). In 2030, the range across districts was 4.0%-6.3%.

206 In contrast to Models II and III, in Model IV the geographical pattern disappeared: the prevalence in  
207 2010 was highest in the central region (about 14% in Lilongwe and the surrounding districts). The  
208 lowest prevalences were projected in Neno (1.9%), Zomba (2.4%) and Phalombe (3.3%), the two  
209 latter being known to have prevalence estimates above 16% in reality. In Model IV, the risk of getting  
210 infected had to be made twice as high than what would be expected by the prevalence abroad in

211 order to keep the national prevalence on an acceptable level. In 2030, the projected prevalence was  
212 below 6% in all districts in all three models.

213 In Model V with a high geographical resolution, the geographical heterogeneity across districts in  
214 year 2010 was approximately in line with Models II and III, ranging from 6.0% (Nkhata Bay) to 16.0%  
215 (Phalombe; [Fig. 4](#)). Small clusters of cells with prevalence around 20% were found across the  
216 Southern region, but also elsewhere, for example in Mchinji district, and along the north and south  
217 borders of Rumphi district in the Northern region. The evolution of the district-level prevalence over  
218 time was also similar to Models II and III. In 2030, the prevalence was above 6% in some individual  
219 cells, mainly in the same cells that had the highest prevalence already in 2010; none of the cells were  
220 HIV free.

221

## 222 **Discussion**

223 A model with simple geographical representation can reproduce the prevalence patterns observed  
224 across Malawi to some extent. The differences in later years were essentially a result of the initial  
225 distribution of the infections at the beginning of the simulation in year 1975. A substantial mixing  
226 between people residing in different areas can smoothen the prevalence across the country very fast:  
227 the heterogeneity could be kept only if sexual relationships between people living in different  
228 geographical locations were restricted to a minimum. Considering international mobility within a  
229 reasonable rate diminished the differences in HIV prevalence rapidly. Increasing the geographical  
230 resolution of the model did not essentially influence the district-level prevalence estimates.

231 We started all simulations with the assumption that HIV was present in 1975 only in districts where  
232 the prevalence in 2010 was at least 10%. This includes all districts of the Southern region, as well as  
233 the districts Mchinji, Ntcheu and Salima (Central region) and Karonga (Northern region). This  
234 assumption is somewhat arbitrary. The first case of HIV was officially detected in Malawi in 1985, but

235 it is reasonable to assume that the disease had been spreading in the country already years  
236 before.[12] The origin of HIV-1 has been localized to Central Africa.[13] Whether HIV had already  
237 spread to the entire Malawi or only selected locations by mid-1970s is unknown. A seroprevalence  
238 survey from Uganda from early 1970s found widespread antibodies in the population, suggesting  
239 that the infection was widespread in Africa already at that time.[14] But as rural areas tend to be  
240 overall less affected by HIV, it could be likely that HIV was introduced only later in places like North  
241 Malawi, which are less densely populated and have limited connections to other regions.[15]  
242 Moreover, there was a strong movement in the early 1970s of Malawian migrant workers moving  
243 back to the country from the neighbouring countries, mainly to take jobs in the growing agricultural  
244 export sector.[16] Most large plantations are located in the Southern region, so it could well be that  
245 the differences in prevalence date back to the 1970s, supporting the assumption that the spread of  
246 HIV in Malawi started in the South or other particular areas. In turn, when we explicitly included  
247 international migration from 1975 onwards in the model we could no longer reproduce the observed  
248 geographical heterogeneity. It may be that migration indeed plays a lesser role in the Malawian HIV  
249 epidemic in the recent decades. On the other hand, this shows that the assumptions on migration  
250 can entirely change the model's results, so more attention should be paid on the true role of  
251 international mobility on the HIV epidemic.

252 The fitted parameter for sex acts was notably high: the observed high prevalence could be reached  
253 only if all individuals had sex outside the regular partnerships at least once every three weeks, which  
254 is hardly realistic. This raises questions about the need of additional features into the model that  
255 would enhance the heterogeneity of partnerships structures. First, the high-risk population could be  
256 further categorized to include also "superspreaders".[17] Second, the structure of regular  
257 partnerships may need to be diversified. In Malawi, 15% of men and 27% of women are estimated to  
258 be living in polygamous relationships:[18] allowing polygamous relationships with partial  
259 concurrence in the model may thus be more realistic than the current approach restricted to distinct  
260 or sequential monogamous partnerships. Third, male-to-male partnerships, currently excluded, may

261 accelerate the spread of HIV. The biological risk of transmission per act is about 10 times higher  
262 between males than males to females;[19] and because homosexuality in Malawi remains illegal and  
263 highly stigmatized, most men having sex with men are likely to also have regular or casual female  
264 partners.[20]

265 All five parameterisations confirmed the future decreasing trend of HIV prevalence: we expect that  
266 by 2030, the national prevalence will be around 5%. The differences between districts will also even  
267 out. While in 2010, the model's outputs were roughly in line with the DHS estimates, as of now (2020)  
268 the range was projected at 3% to 10%, and by 2030 no district would have a prevalence higher than  
269 6%. Data from the Malawi Population-based HIV Impact Assessment (MPHIA) showed that  
270 differences across geographical districts still existed in 2015, and the trends were similar as in the  
271 2010 DHS survey.[21] The differences may thus be levelling out slower than according to our models.  
272 This would support the hypothesis that the differences do not only depend on transmission dynamics  
273 but also on risk behaviour, which in turn could be influenced by sociobehavioural factors. Direct  
274 determinants of the risk of acquiring HIV, such as the number of unprotected sex acts and variability  
275 of partners, are strongly associated with social determinants. In the complex network of factors  
276 potentially associated with HIV, urbanity and literacy were the most central variables.

277 The model with fine resolution led to similar results as the district-level models, with a few  
278 characteristics worth noting. The smoothening of prevalence between districts was faster than within  
279 the district-level models particularly in the Northern region, despite the fact that in only one of the  
280 six Northern districts (Karonga) HIV was assumed to be present in 1975. This could be due to the  
281 population density: in the model with fine resolution, in the North each cell had a much smaller  
282 population than the South, meaning that more people had to seek partners from outside their own  
283 cell. In turn, in the district model the number of people per district was relatively similar, since the  
284 districts in the North tend to have larger areas than in the South. Another interesting pattern was the  
285 prevalence patterns in the border areas and along the lakeshore. For example, the narrow strip in

286 Mangochi District between Lake Malawi and Mozambique border had cells with both very high and  
287 very low prevalence. These cells have only few other cells within a small radius, so people tend to  
288 seek partners more frequently from their own cell than in inland locations far from the borders. A  
289 similar pattern was seen in the district of Nsanje, which is almost completely surrounded by national  
290 border. Nsanje had a much lower prevalence than the rest of the Southern region in the fine  
291 resolution model, which contradicts both the data and the other models. In regions with few  
292 connections between cells, chance is likely to play also a major role in how the epidemic will develop.

293 Our study had several limitations. Because of the computationally expensive model structure, the  
294 parameter fitting was done on an ad hoc basis, and parameter uncertainty or the stochastic  
295 variability of the results was not estimated. The model's findings were also based on the arbitrarily  
296 chosen distribution of HIV in 1975. Several key factors were ignored in the model, including  
297 polygamy and concurrent regular partnerships, male-to-male transmission, and the associations  
298 between high-risk behaviour and mobility. However, the model developed for this study serves as a  
299 basis for further extensions.

## 300 **Conclusions**

301 The high prevalence in Southern Malawi may have developed partly as a result of an earlier  
302 introduction of HIV into this region. This could possibly be related to the return of Malawians from  
303 abroad in the 1970s. On the other hand, the models required a high number of sexual contacts for  
304 the entire population to realistically represent the further spread of the epidemic. The obvious  
305 explanation would be that there are also behavioural factors that accelerated transmission,  
306 particularly in the Southern region. Our results of this project form a basis for further evaluation and  
307 understanding of both the Malawian and global HIV epidemic: our model can take into consideration,  
308 in addition to the geographical dimension, an arbitrary number of individual-level factors, and can  
309 easily be adapted to other countries or settings. Whereas the broad difference between Southern  
310 Malawi and the rest of the country may well be due to the connection network between districts, the

311 variability of the socio-behavioural factors and their impact on HIV transmission needs to be  
312 quantified. Implementing these differences into mathematical models may help to get an in-depth  
313 understanding of the differences in HIV prevalence within countries.

314

## 315 **Acknowledgments**

316 OK was supported by the Swiss National Science Foundation (grant 163878).

317

318

## 319 References

- 320 1. Joint United Nations Programme for HIV/AIDS (UNAIDS). AIDSInfo. Geneva, Switzerland:  
321 UNAIDS; 2020. Available at: <https://aidsinfo.unaids.org/>.
- 322 2. Cuadros DF, Li J, Branscum AJ, Akullian A, Jia P, Mziray EN, *et al*. Mapping the spatial  
323 variability of HIV infection in Sub-Saharan Africa: Effective information for localized IV  
324 prevention and control. *Sci Rep* 2017; 7:9093.
- 325 3. Joint United Nations Programme for HIV/AIDS (UNAIDS). Malawi. Developing subnational  
326 estimates of HIV prevalence and the number of people living with HIV. Geneva, Switzerland:  
327 UNAIDS; 2014. Available at: <http://www.epidem.org/sites/default/files/reports/Malawi.pdf>
- 328 4. Agyei-Mensah S. The HIV/AIDS epidemic in sub-Saharan Africa: Homogeneity or  
329 heterogeneity? *Nor J Geogr* 2004; 59:14-25.
- 330 5. Blaser N, Salazar-Vizcaya L, Estill J, Zahnd C, Kalesan B, Egger M, *et al*. gems: An R package for  
331 simulating from disease progression models. *J Stat Softw* 2015; 64:1-22.
- 332 6. Estill J, Kerr CC, Blaser N, Salazar-Vizcaya L, Tenthani L, Wilson DP, *et al*. The effect of  
333 monitoring viral load and tracing patients lost to follow-up on the course of the HIV epidemic  
334 in Malawi: A mathematical model. *Open Forum Infect Dis* 2018; 5:ofy092.
- 335 7. Estill J, Ford N, Salazar-Vizcaya L, Haas AD, Blaser N, Habiyambere V, *et al*. The need for  
336 second-line antiretroviral therapy in adults in sub-Saharan Africa up to 2030: a mathematical  
337 modelling study. *Lancet HIV* 2016; 3:e132-9.
- 338 8. Estill J, Tweya H, Egger M, Wandeler G, Feldacker C, Johnson LF, *et al*. Tracing of patients lost  
339 to follow-up and HIV transmission: mathematical modelling study based on 2 large ART  
340 programs in Malawi. *J Acquir Immune Defic Syndr* 2014; 65:e179-86.
- 341 9. Segal E. Projections of internal migration in Malawi: Implications for development. *J Mod Afr*  
342 *Stud* 1985; 23:315-29.
- 343 10. ICF. The DHS Program. Rockville, MD: ICF; 2020. Available at: <https://dhsprogram.com/>

- 344 11. United Nations, DESA-Population Division and UNICEF. Migration Profiles Common Set of  
345 Indicators. Malawi. New York, NY: United Nations; 2014. Available at:  
346 <https://esa.un.org/MigGMGProfiles/indicators/indicators.htm>
- 347 12. Mwale B. HIV/AIDS in Malawi. *Malawi Med J* 2002; 14(2):2-3.
- 348 13. Gao F, Bailes E, Robertson DL, Chen Y, Rodenburg CM, Michael SF, *et al.* Origin of HIV-1 in the  
349 chimpanzee *Pan troglodytes troglodytes*. *Nature* 1999; 397:436-41.
- 350 14. Saxiger WC, Levine PH, Dean AG, de Thé G, Lange-Wantzin G, Moghissi J, *et al.* Evidence for  
351 exposure to HTLV-III in Uganda before 1973. *Science* 1985; 227:1036-8.
- 352 15. World Health Organization (WHO). The Global Health Observatory. Geneva, Switzerland:  
353 WHO; 2020. Available at: <https://www.who.int/data/gho>.
- 354 16. Christiansen RE, Kydd JG. The return of Malawian labour from South Africa and Zimbabwe. *J*  
355 *Mod Afr Stud* 1983; 21:311-26.
- 356 17. Lloyd-Smith JO, Schreiber SJ, Kopp PE, Getz WM. Superspreading and the effect of individual  
357 variation on disease emergence. *Nature* 2005; 438:355-9.
- 358 18. Marston M, Slaymaker E, Cremin I, Floyd S, McGrath N, Kasamba I, *et al.* Trends in marriage  
359 and time spent single in sub-Saharan Africa: a comparative analysis of six population-based  
360 cohort studies and nine Demographic Health Surveys. *Sex Transm Infect* 2009; 85 Suppl 1:i64-  
361 71.
- 362 19. Wilson DP, Law MG, Grulich AE, Cooper DA, Kaldor JM. Relation between HIV viral load and  
363 infectiousness: a model-based analysis. *Lancet* 2008; 372:314-20.
- 364 20. Beyrer C, Trapence G, Motimedi F, Umar E, Lipinge S, Dausab F, *et al.* Bisexual concurrency,  
365 bisexual partnerships, and HIV among Southern African men who have sex with men. *Sex*  
366 *Transm Infect* 2010; 86:323-7.
- 367 21. Malawi Ministry of Health. Malawi Population-based HIV Impact Assessment 2015-16. Final  
368 report. Lilongwe, Malawi: Ministry of Health; 2018. Available at:  
369 [https://phia.icap.columbia.edu/wp-content/uploads/2020/02/MPHIA-Final-Report\\_web.pdf](https://phia.icap.columbia.edu/wp-content/uploads/2020/02/MPHIA-Final-Report_web.pdf)



370 **Tables**

371 **Table 1. List of modelled scenarios**

| Model | Description                                     | Distinct locations | Movements* between locations | International movements* | Mixing** between locations | Fitted variables                                  |
|-------|-------------------------------------------------|--------------------|------------------------------|--------------------------|----------------------------|---------------------------------------------------|
| I     | Baseline                                        | 1                  | n/a                          | n/a                      | n/a                        | Casual sex acts                                   |
| II    | District model                                  | 28                 | No                           | No                       | No                         | Casual sex acts, district-level movement* rates   |
| III   | District model with inter-district transmission | 28                 | Yes                          | No                       | Yes                        | Casual sex acts, mixing** rates between districts |
| IV    | District model with immigration                 | 29***              | Yes                          | Yes                      | No                         | Casual sex acts, infection risk abroad            |
| V     | Grid model with inter-cell transmission         | 946                | Yes                          | No                       | Yes                        | Casual sex acts, mixing** rates between cells     |

372 \*Movements refer to permanent relocations (i.e. individuals moving to another geographical location for a duration of at least one year).

373 \*\*Mixing refers to casual relationships with unprotected sex between individuals who reside in different geographical locations.

374 \*\*\*The 29<sup>th</sup> location corresponds to the Malawian and Malawi-connected population outside the country, and is treated regarding transmission differently  
375 from the remaining locations.

376

## 377 **Figure captions**

378 **Figure 1. Schematic representation of the mathematical model.** The left panel (pink) shows the  
379 main structure of the transmission model with a loop over time steps. The middle panel (yellow)  
380 shows the transmission algorithm, applied at each time step, in more detail. The right panel (green)  
381 shows the HIV disease progression simulation, which is run for each patient at the time of infection.

382 **Figure 2. National HIV prevalence among adults aged 15-49 years in Malawi 1990-2030 in the five**  
383 **different models.** Model I (black curve): no geographical structure; Model II (blue curve): 28 districts,  
384 no international migration, no casual sex between districts; Model III (green curve): 28 districts,  
385 casual sex between districts allowed, no international migration; Model IV (yellow curve): 28 districts,  
386 casual sex between districts allowed, international migration considered; Model V (red curve): 946  
387  $10 \times 10 \text{ km}^2$  cells, casual sex between cells allowed, no international migration. The dashed curves in  
388 panel A show the UNAIDS projections.

389 **Figure 3. HIV prevalence among adults aged 15-49 years in 2010, 2020 and 2030 in the 28**  
390 **administrative districts of Malawi in models with district-level geographical structure.** Panel A:  
391 Data from the Demographic and Health Surveys (DHS) in 2010. Panels B-D: Model II (no international  
392 migration, no casual sex between districts). Panels E-G: Model III (casual sex between districts  
393 allowed; no international migration). Panels H-J: Model IV (casual sex between districts allowed;  
394 international migration included).

395 **Figure 4. HIV prevalence among adults aged 15-49 years in 2010, 2020 and 2030 in Malawi in the**  
396 **model with a geographical resolution of  $10 \times 10 \text{ km}^2$  (Model V).** Panel A: Data from the Demographic  
397 and Health Surveys (DHS) in 2010 for the 28 administrative districts. Panels B-D: Model estimates for  
398 the 28 administrative districts. Panels E-G: Model estimates for the 946 cells.

399

## 400 **Supporting information**

401 Supporting information.docx (contains the following items):

402 **Text S1. Technical details of the model**

403 **Table S1. Parameters of the transmission model.**

404 **Table S2. Parameters of the disease progression model.**

405 **Table S3. Parameters related to the geographical dimension.**

406 **Table S4. District-specific in- and out-movement rates (models II to V).**

407 **Figure S1. Average annual unprotected sex acts with casual partners in the models I to V.**

### Transmission module: Main structure

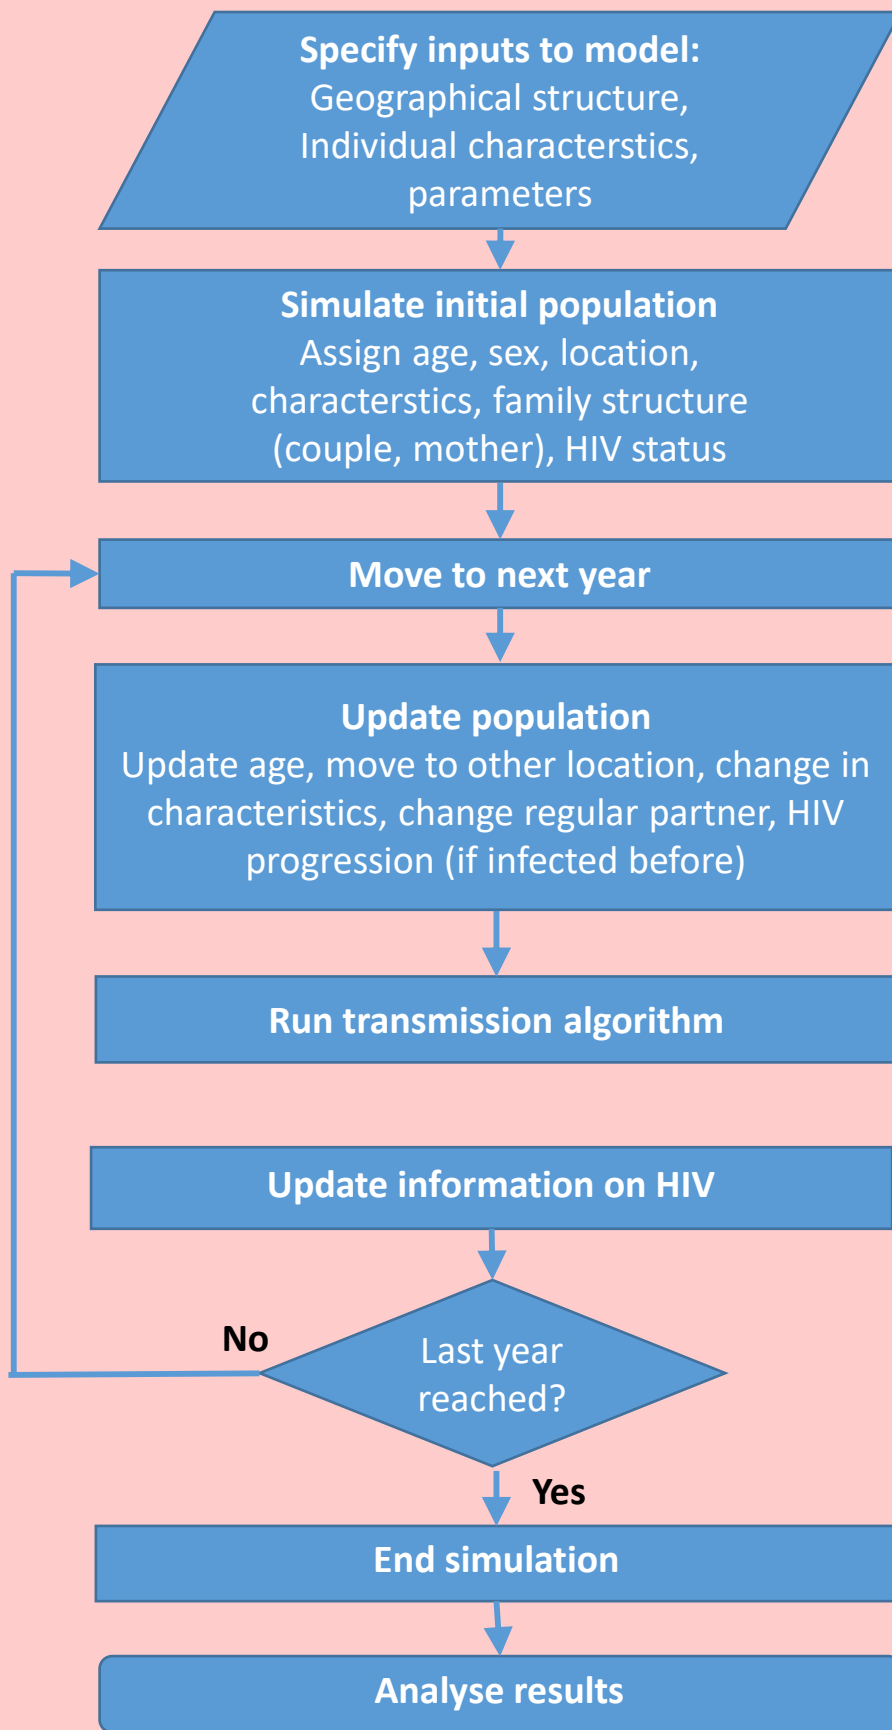

### Transmission module: Transmission algorithm

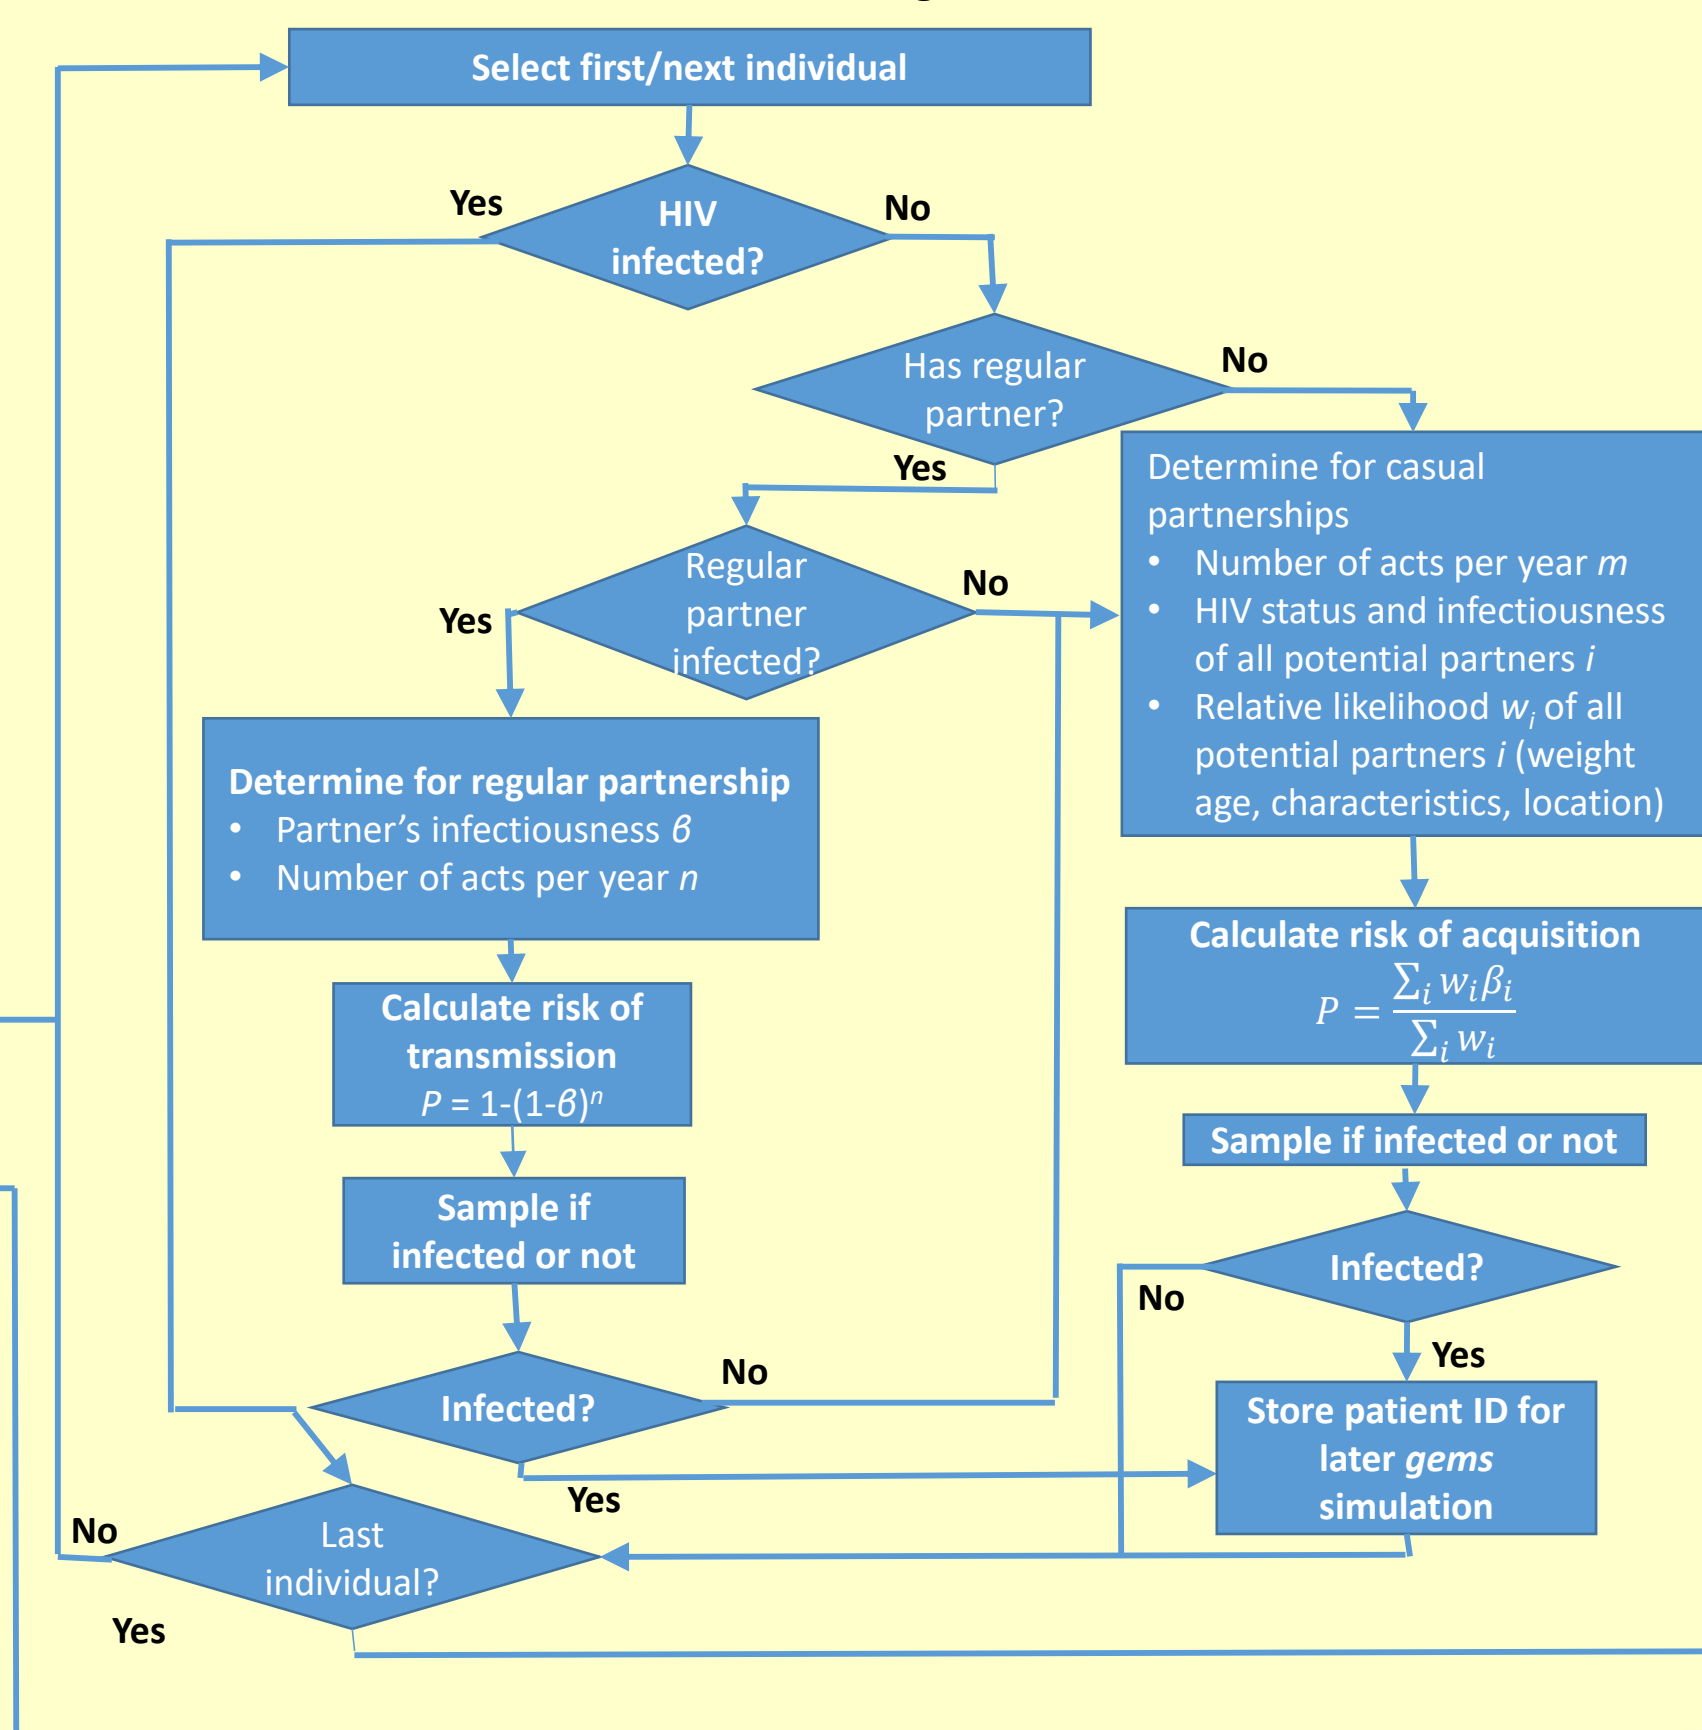

### Disease module

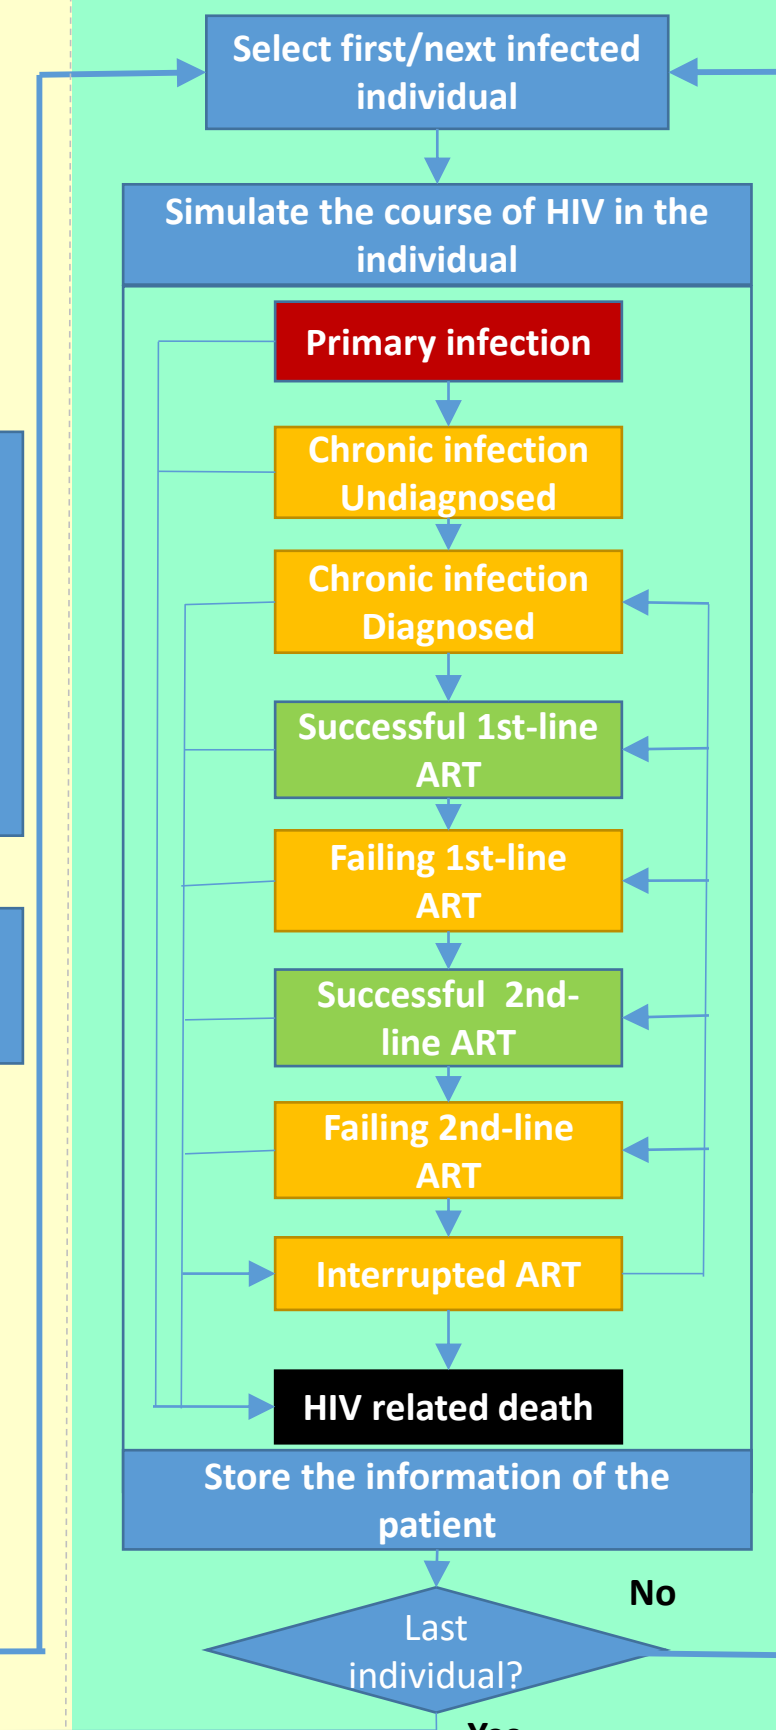

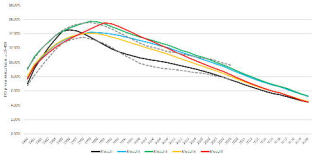

**A) Data (DHS, 2007-08)**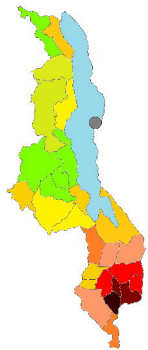**B) Model II, 2010**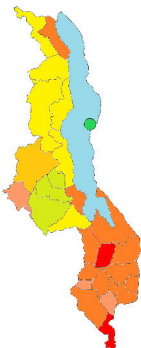**C) Model II, 2020**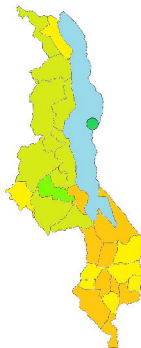**D) Model II, 2030**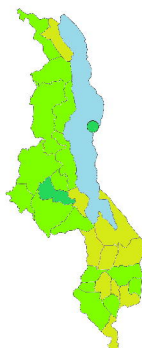**E) Model III, 2010**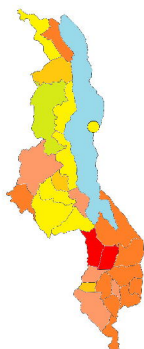**F) Model III, 2020**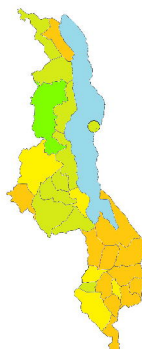**G) Model III, 2030**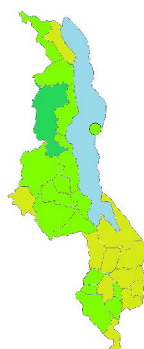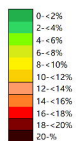**H) Model IV, 2010**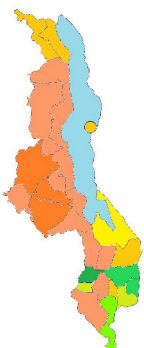**I) Model IV, 2020**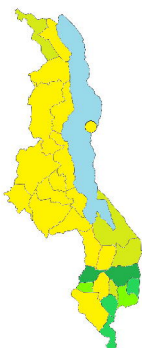**J) Model IV, 2030**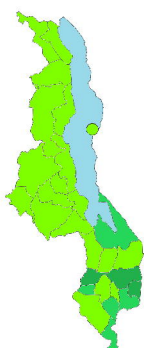

**A) Data (DHS, 2010)**

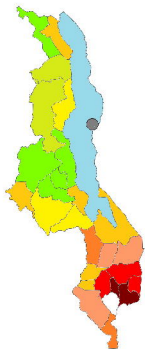

**B) Model V, 2010**

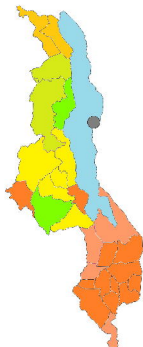

**C) Model V, 2020**

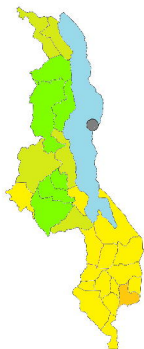

**D) Model V, 2030**

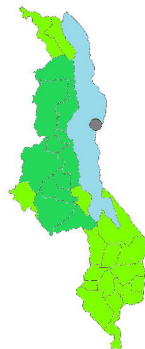

**E) Model V, 2010**

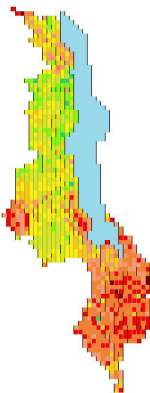

**F) Model V, 2020**

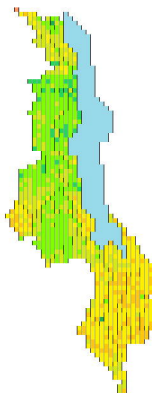

**G) Model V, 2030**

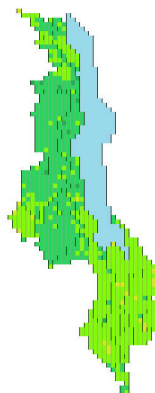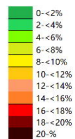

Source: https://medrxiv.org/content/10.1101/2020.12.23.20248757v3.full.pdf
